# Supplementary material
Source: PubMed Central journal article supplement (PMC5568651)
Supplement: NIHMS887767-supplement-Legends_supplemental_figures.pdf [file NIHMS887767-supplement-Legends_supplemental_figures.pdf]

Supplemental Figure 1: Comparison of Time-to-Threshold between oligo sets.

Time to positive vs Primer set. Comparison of three oligo sets with and without loop primer. Primer set 29 with loop demonstrated superior time to positive at under 30 minutes.

Supplemental Figure 2: Probit Regression Analysis.

The limit of detection at 95% probability is 208 viral copies for n=9 runs of the RNA standard.
