# Supplementary material
Source: PubMed Central journal article supplement (PMC5568651)

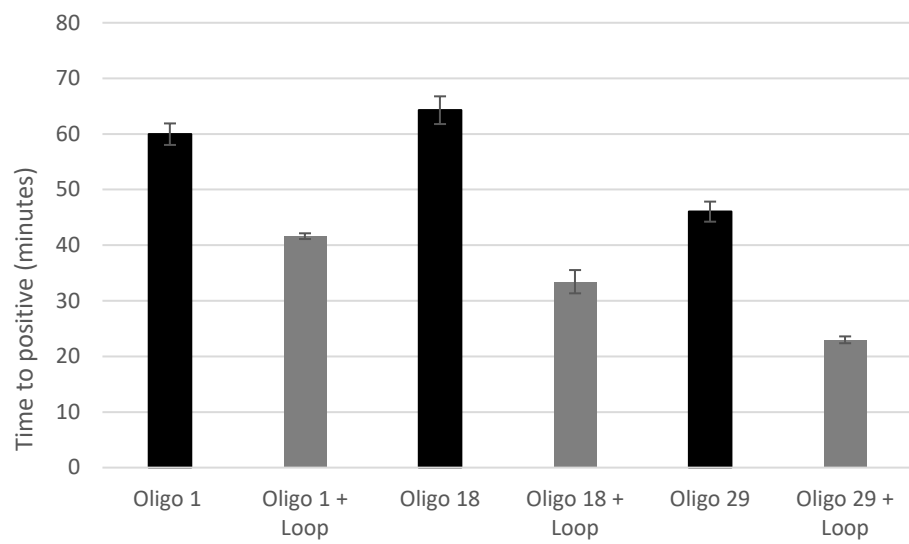

Supplement: NIHMS887767-supplement-Supplemental_figure_1.pdf [file NIHMS887767-supplement-Supplemental_figure_1.pdf]

| Predicted % positive | Template copy number |
|----------------------|----------------------|
| 10                   | 6.33                 |
| 20                   | 10.71                |
| 30                   | 15.70                |
| 40                   | 21.67                |
| 50                   | 29.21                |
| 60                   | 39.38                |
| 70                   | 54.37                |
| 80                   | 79.69                |
| 90                   | 134.79               |
| <b>95</b>            | <b>208.46</b>        |
| 99                   | 472.52               |

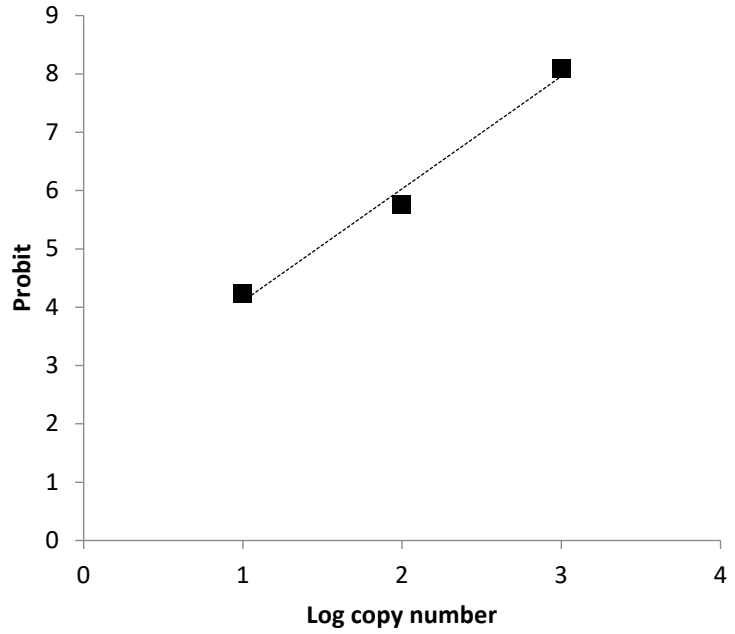

Supplement: NIHMS887767-supplement-Supplemental_figure_2.pdf [file NIHMS887767-supplement-Supplemental_figure_2.pdf]
